# Supplementary material
Source: PubMed Central journal article supplement (PMC11217863)
Supplement: jmcp.2024.30.7.672_s001.pdf [file jmcp.2024.30.7.672_s001.pdf]

## SUPPLEMENTARY MATERIALS

### Clinical characteristics and treatment patterns of patients with NTRK fusion–positive solid tumors: A multisite cohort study at US academic cancer centers

Connor Willis, PharmD; Trang Au, PharmD; Andre Hejazi, PharmD; Cassia Griswold, PharmD; Matthew B. Schabath, PhD; Jonathan Thompson, MD; Jyoti Malhotra, MD, MPH; Noah Federman, MD; Gilbert Ko, PharmD, MBA, MS; Sreevalsa Appukkuttan, MPH, MBBS; Neil Warnock, MD; Sheldon X. Kong, PhD; Brian Hocum, PharmD, MS; Diana Brixner, PhD; David Stenehjem, PharmD

**Supplementary Table 1. Genetic alterations**

| Genetic Alteration, n (%) | Non-TRKi (N=27) | TRKi (N=28) | All (N=55) |
|---------------------------|-----------------|-------------|------------|
| <i>TP53</i>               | 6 (22%)         | 7 (25%)     | 13 (24%)   |
| <i>CDKN2A</i>             | 4 (15%)         | 4 (14%)     | 8 (15%)    |
| <i>NTRK1</i>              | 7 (26%)         | 1 (4%)      | 8 (15%)    |
| <i>ARID1A</i>             | 4 (15%)         | 3 (11%)     | 7 (13%)    |
| <i>PTEN</i>               | 3 (11%)         | 4 (14%)     | 7 (13%)    |
| <i>ALK</i>                | 2 (7%)          | 3 (11%)     | 5 (9%)     |
| <i>ATM</i>                | 4 (15%)         | 1 (4%)      | 5 (9%)     |
| <i>BRCA2</i>              | 2 (7%)          | 3 (11%)     | 5 (9%)     |
| <i>KRAS</i>               | 4 (15%)         | 1 (4%)      | 5 (9%)     |
| <i>PIK3CA</i>             | 3 (11%)         | 2 (7%)      | 5 (9%)     |
| <i>AR</i>                 | 2 (7%)          | 2 (7%)      | 4 (7%)     |
| <i>ASXL1</i>              | 3 (11%)         | 1 (4%)      | 4 (7%)     |
| <i>MSH6</i>               | 2 (7%)          | 2 (7%)      | 4 (7%)     |
| <i>NTRK3</i>              | 3 (11%)         | 1 (4%)      | 4 (7%)     |
| <i>PTCH1</i>              | 4 (15%)         | 0 (0%)      | 4 (7%)     |
| <i>RNF43</i>              | 4 (15%)         | 0 (0%)      | 4 (7%)     |
| <i>STK11</i>              | 3 (11%)         | 1 (4%)      | 4 (7%)     |
| <i>ATRX</i>               | 1 (4%)          | 2 (7%)      | 3 (5%)     |
| <i>CCNE1</i>              | 1 (4%)          | 2 (7%)      | 3 (5%)     |
| <i>CDKN2B</i>             | 0 (0%)          | 3 (11%)     | 3 (5%)     |
| <i>CTNNB1</i>             | 3 (11%)         | 0 (0%)      | 3 (5%)     |
| <i>FBXW7</i>              | 2 (7%)          | 1 (4%)      | 3 (5%)     |
| <i>GNAS</i>               | 2 (7%)          | 1 (4%)      | 3 (5%)     |

|               |        |        |        |
|---------------|--------|--------|--------|
| <i>KDR</i>    | 2 (7%) | 1 (4%) | 3 (5%) |
| <i>KEAP1</i>  | 1 (4%) | 2 (7%) | 3 (5%) |
| <i>KIT</i>    | 2 (7%) | 1 (4%) | 3 (5%) |
| <i>MET</i>    | 1 (4%) | 2 (7%) | 3 (5%) |
| <i>MLH1</i>   | 2 (7%) | 1 (4%) | 3 (5%) |
| <i>MSH3</i>   | 2 (7%) | 1 (4%) | 3 (5%) |
| <i>NOTCH3</i> | 2 (7%) | 1 (4%) | 3 (5%) |

**Supplementary Table 2. Radiation therapy**

|                                          | Non-TRKi (N=27) | TRKi (N=28) | All (N=55) |
|------------------------------------------|-----------------|-------------|------------|
| <b>Number of radiation cycles, n (%)</b> |                 |             |            |
| 1 cycle                                  | 27 (100%)       | 12 (43%)    | 39 (71%)   |
| 2 cycles                                 | 5 (19%)         | 8 (29%)     | 13 (24%)   |
| 3 cycles                                 | 1 (4%)          | 5 (18%)     | 6 (11%)    |
| 4+ cycles                                | 1 (4%)          | 4 (14%)     | 5 (9%)     |

**Supplementary Table 3. Timing of *NTRK* testing among patients receiving 1L therapy (n=46)**

| Variable, n (%)                                            | Pre-TRKi*<br>(n=16) | Post-TRKi <sup>σ</sup><br>(n=30) | All<br>(n=46) |
|------------------------------------------------------------|---------------------|----------------------------------|---------------|
| Patients receiving <i>NTRK</i> testing prior to 1L therapy | 3 (19%)             | 17 (57%)                         | 20 (43%)      |

\* Therapies received prior to FDA approval of Larotrectinib (11/2018)

<sup>σ</sup> Therapies received after FDA approval of Larotrectinib (11/2018)

**Supplementary Table 4. Treatment patterns**

| Therapy type, n (%)       | Pre-TRKi*<br>N=16 | Post-TRKi <sup>σ</sup><br>N=30 |
|---------------------------|-------------------|--------------------------------|
| <b>First-line Therapy</b> |                   |                                |
| TRKi                      | 0 (0%)            | 10 (33%)                       |
| DoT (days), median (IQR)  | NA                | 610 (182-764)                  |
| Other therapies           | 16 (100%)         | 20 (67%)                       |
| DoT (days), median (IQR)  | 181.5 (67-642)    | 207.5 (42-539)                 |

|                                       |                 |                 |
|---------------------------------------|-----------------|-----------------|
| Chemotherapy                          | 12 (75%)        | 11 (37%)        |
| DoT (days), median (IQR)              | 148 (67-378)    | 146 (42-849)    |
| Other targeted therapy                | 3 (19%)         | 3 (10%)         |
| DoT (days), median (IQR)              | 1152 (721-1395) | 122 (20-452)    |
| Immunotherapy                         | 1 (6%)          | 2 (7%)          |
| DoT (days), median (IQR)              | 21 (21-21)      | 389.5 (363-416) |
| Chemotherapy + other targeted therapy | 0 (0%)          | 1 (3%)          |
| DoT (days), median (IQR)              | NA              | 14 (14-14)      |
| Chemotherapy + immunotherapy          | 0 (0%)          | 3 (10%)         |
| DoT (days), median (IQR)              | NA              | 464 (105-1146)  |
| <b>Second-line Treatment</b>          | <b>N=10</b>     | <b>N=23</b>     |
| TRKi                                  | 0 (0%)          | 11 (48%)        |
| DoT (days), median (IQR)              | NA              | 103 (47-292)    |
| Other therapies                       | 10 (100%)       | 12 (52%)        |
| DoT (days), median (IQR)              | 100 (63-348)    | 101 (28-178)    |
| Chemotherapy                          | 6 (60%)         | 5 (22%)         |
| DoT (days), median (IQR)              | 77.5 (59-108)   | 101 (54-119)    |
| Other targeted therapy                | 2 (20%)         | 2 (9%)          |
| DoT (days), median (IQR)              | 646.5 (68-1225) | 125 (28-222)    |
| Immunotherapy                         | 2 (20%)         | 3 (13%)         |
| DoT (days), median (IQR)              | 296.5 (200-393) | 124 (0-237)     |
| Chemotherapy + TRKi                   | 0 (0%)          | 1 (4%)          |
| DoT (days), median (IQR)              | NA              | 35 (35-35)      |
| Chemotherapy + immunotherapy          | 0 (0%)          | 1 (4%)          |
| DoT (days), median (IQR)              | NA              | 43 (43-43)      |
| <b>Third-line Treatment</b>           | <b>N=5</b>      | <b>N=12</b>     |
| TRKi                                  | 0 (0%)          | 2 (17%)         |
| DoT (days), median (IQR)              | NA              | 79 (44-114)     |
| Other therapies                       | 5 (100%)        | 10 (83%)        |
| DoT (days), median (IQR)              | 92 (63-210)     | 33 (12-112)     |
| Chemotherapy                          | 3 (60%)         | 6 (50%)         |
| DoT (days), median (IQR)              | 63 (1-92)       | 33 (12-112)     |
| Other targeted therapy                | 1 (20%)         | 0 (0%)          |
| DoT (days), median (IQR)              | 472 (472-472)   | NA              |
| Immunotherapy                         | 0 (0%)          | 2 (17%)         |
| DoT (days), median (IQR)              | NA              | 119 (21-217)    |
| Chemotherapy + other targeted therapy | 1 (20%)         | 2 (17%)         |
| DoT (days), median (IQR)              | 210 (210-210)   | 39.5 (9-70)     |
| <b>Fourth-line Treatment</b>          | <b>N=4</b>      | <b>N=7</b>      |
| TRKi                                  | 0 (0%)          | 2 (29%)         |

|                                       |               |                 |
|---------------------------------------|---------------|-----------------|
| DoT (days), median (IQR)              | NA            | 660.5 (421-900) |
| Other therapies                       | 4 (100%)      | 5 (71%)         |
| DoT (days), median (IQR)              | 271 (191-364) | 73 (72-82)      |
| Chemotherapy                          | 0 ( 0%)       | 1 (14%)         |
| DoT (days), median (IQR)              | NA            | 21 (21-21)      |
| Other targeted therapy                | 2 (50%)       | 1 (14%)         |
| DoT (days), median (IQR)              | 284 (142-426) | 72 (72-72)      |
| Immunotherapy                         | 1 (25%)       | 1 (14%)         |
| DoT (days), median (IQR)              | 240 (240-240) | 82 (82-82)      |
| Chemotherapy + other targeted therapy | 1 (25%)       | 2 (29%)         |
| DoT (days), median (IQR)              | 302 (302-302) | 124.5 (73-176)  |

---

DoT, duration of therapy

\* Therapies received prior to FDA approval of Larotrectinib (11/2018)

s Therapies received after FDA approval of Larotrectinib (11/2018)

**Supplementary Table 5. Baseline demographics among patients receiving first-line therapy (n=46)**

| Variable, n (%)                    | Pre-TRKi*       |                            | Post-TRKi <sup>o</sup> |                            | All<br>N=46    |
|------------------------------------|-----------------|----------------------------|------------------------|----------------------------|----------------|
|                                    | TRK<br>i<br>N=0 | Other<br>therapies<br>N=16 | TRKi<br>N=10           | Other<br>therapies<br>N=20 |                |
| <b>Age, mean years (SD)</b>        | NA              | 48.1 (17.7)                | 49.8<br>(25.0)         | 55.6 (20.3)                | 51.7<br>(20.4) |
| <b>Gender</b>                      |                 |                            |                        |                            |                |
| Female                             | NA              | 10 (62%)                   | 2 (20%)                | 12 (60%)                   | 24 (52%)       |
| <b>Ethnicity</b>                   |                 |                            |                        |                            |                |
| Hispanic                           | NA              | 2 (12%)                    | 1 (10%)                | 5 (25%)                    | 8 (17%)        |
| Non-Hispanic                       | NA              | 14 (88%)                   | 9 (90%)                | 15 (75%)                   | 38 (83%)       |
| <b>Race</b>                        |                 |                            |                        |                            |                |
| White                              | NA              | 15 (94%)                   | 7 (70%)                | 12 (60%)                   | 34 (74%)       |
| Black                              | NA              | 0 (0%)                     | 1 (10%)                | 1 (5%)                     | 2 (4%)         |
| Other                              | NA              | 1 (6%)                     | 2 (20%)                | 3 (15%)                    | 6 (13%)        |
| Unknown                            | NA              | 0 (0%)                     | 0 (0%)                 | 2 (10%)                    | 2 (4%)         |
| <b>Plan Type at Diagnosis*</b>     |                 |                            |                        |                            |                |
| Commercial                         | NA              | 10 (62%)                   | 3 (30%)                | 13 (65%)                   | 26 (57%)       |
| Medicaid                           | NA              | 1 (6%)                     | 1 (10%)                | 0 (0%)                     | 2 (4%)         |
| Medicare                           | NA              | 3 (19%)                    | 4 (40%)                | 6 (30%)                    | 13 (28%)       |
| Uninsured/Self-pay                 | NA              | 0 (0%)                     | 1 (10%)                | 0 (0%)                     | 1 (2%)         |
| Other                              | NA              | 0 (0%)                     | 1 (10%)                | 1 (5%)                     | 2 (4%)         |
| Unknown                            | NA              | 3 (19%)                    | 0 (0%)                 | 0 (0%)                     | 3 (7%)         |
| <b>Comorbidities</b>               |                 |                            |                        |                            |                |
| Myocardial infarction              | NA              | 1 (6%)                     | 0 (0%)                 | 0 (0%)                     | 1 (2%)         |
| Congestive heart failure           | NA              | 1 (6%)                     | 0 (0%)                 | 1 (5%)                     | 2 (4%)         |
| Chronic Pulmonary Disease          | NA              | 2 (12%)                    | 2 (20%)                | 0 (0%)                     | 4 (9%)         |
| Dementia                           | NA              | 0 (0%)                     | 0 (0%)                 | 1 (5%)                     | 1 (2%)         |
| Diabetes w/o chronic complications | NA              | 1 (6%)                     | 1 (10%)                | 2 (10%)                    | 4 (9%)         |
| Hemiplegia or paraplegia           | NA              | 1 (6%)                     | 0 (0%)                 | 0 (0%)                     | 1 (2%)         |
| Renal Disease                      | NA              | 0 (0%)                     | 1 (10%)                | 0 (0%)                     | 1 (2%)         |
| Mild Liver Disease                 | NA              | 0 (0%)                     | 0 (0%)                 | 2 (10%)                    | 2 (4%)         |
| Peptic Ulcer Disease               | NA              | 1 (6%)                     | 0 (0%)                 | 0 (0%)                     | 1 (2%)         |
| Rheumatologic Disease              | NA              | 1 (6%)                     | 0 (0%)                 | 0 (0%)                     | 1 (2%)         |
| None                               | NA              | 11 (69%)                   | 7 (70%)                | 15 (75%)                   | 33 (72%)       |

**Supplementary Table 6. Cancer characteristics among patients receiving first-line therapy (n=46)**

|                                     | Pre-TRKi*       |                            | Post-TRKi <sup>σ</sup> |                            | All<br>N=46 |
|-------------------------------------|-----------------|----------------------------|------------------------|----------------------------|-------------|
|                                     | TRK<br>i<br>N=0 | Other<br>therapies<br>N=16 | TRKi<br>N=10           | Other<br>therapies<br>N=20 |             |
| <b>Cancer type, n (%)</b>           |                 |                            |                        |                            |             |
| Brain                               | NA              | 4 (25%)                    | 0 (0%)                 | 2 (10%)                    | 6 (13%)     |
| Breast                              | NA              | 1 (6%)                     | 0 (0%)                 | 2 (10%)                    | 3 (7%)      |
| Colorectal                          | NA              | 1 (6%)                     | 0 (0%)                 | 5 (25%)                    | 6 (13%)     |
| Endometrial                         | NA              | 1 (6%)                     | 0 (0%)                 | 0 (0%)                     | 1 (2%)      |
| Gastric                             | NA              | 1 (6%)                     | 0 (0%)                 | 0 (0%)                     | 1 (2%)      |
| Salivary gland                      | NA              | 1 (6%)                     | 4<br>(40%)             | 1 (5%)                     | 6 (13%)     |
| Lung                                | NA              | 1 (6%)                     | 2<br>(20%)             | 4 (20%)                    | 7 (15%)     |
| Melanoma                            | NA              | 0 (0%)                     | 0 (0%)                 | 1 (5%)                     | 1 (2%)      |
| Other                               | NA              | 0 (0%)                     | 0 (0%)                 | 1 (5%)                     | 1 (2%)      |
| Ovarian                             | NA              | 1 (6%)                     | 0 (0%)                 | 1 (5%)                     | 2 (4%)      |
| Pancreatic                          | NA              | 0 (0%)                     | 0 (0%)                 | 1 (5%)                     | 1 (2%)      |
| Prostate                            | NA              | 1 (6%)                     | 0 (0%)                 | 0 (0%)                     | 1 (2%)      |
| Sarcoma                             | NA              | 3 (19%)                    | 1<br>(10%)             | 0 (0%)                     | 4 (9%)      |
| Thyroid                             | NA              | 1 (6%)                     | 3<br>(30%)             | 2 (10%)                    | 6 (13%)     |
| <b>Stage at cancer diagnosis</b>    |                 |                            |                        |                            |             |
| I                                   | NA              | 4 (27%)                    | 2<br>(20%)             | 2 (10%)                    | 8 (18%)     |
| II                                  | NA              | 1 (7%)                     | 1<br>(10%)             | 2 (10%)                    | 4 (9%)      |
| III                                 | NA              | 5 (33%)                    | 0 (0%)                 | 5 (25%)                    | 10<br>(22%) |
| IV                                  | NA              | 3 (20%)                    | 5<br>(50%)             | 10 (50%)                   | 18<br>(40%) |
| Unknown                             | NA              | 2 (13%)                    | 2<br>(20%)             | 1 (5%)                     | 5 (11%)     |
| <b>Stage at <i>NTRK</i> testing</b> |                 |                            |                        |                            |             |
| I                                   | NA              | 0 (0%)                     | 1<br>(10%)             | 0 (0%)                     | 1 (2%)      |
| II                                  | NA              | 1 (6%)                     | 0 (0%)                 | 1 (5%)                     | 2 (4%)      |
| III                                 | NA              | 2 (12%)                    | 0 (0%)                 | 5 (25%)                    | 7 (15%)     |

|                                               |    |          |            |          |             |
|-----------------------------------------------|----|----------|------------|----------|-------------|
| IV                                            | NA | 13 (81%) | 7<br>(70%) | 13 (65%) | 33<br>(72%) |
| Unknown                                       | NA | 0 (0%)   | 2<br>(20%) | 1 (5%)   | 3 (7%)      |
| <b>ECOG score at initial cancer diagnosis</b> |    |          |            |          |             |
| 0                                             | NA | 9 (56%)  | 4<br>(40%) | 9 (45%)  | 22<br>(48%) |
| 1                                             | NA | 3 (19%)  | 3<br>(30%) | 8 (40%)  | 14<br>(30%) |
| 2                                             | NA | 0 (0%)   | 2<br>(20%) | 1 (5%)   | 3 (7%)      |
| Unknown                                       | NA | 4 (25%)  | 1<br>(10%) | 2 (10%)  | 7 (15%)     |
| <b>Site of metastases</b>                     |    |          |            |          |             |
| Lung                                          | NA | 4 (25%)  | 5<br>(50%) | 4 (20%)  | 13<br>(28%) |
| Liver                                         | NA | 3 (19%)  | 2<br>(20%) | 7 (35%)  | 12<br>(26%) |
| Brain                                         | NA | 4 (25%)  | 1<br>(10%) | 3 (15%)  | 8 (17%)     |
| Bone                                          | NA | 3 (19%)  | 3<br>(30%) | 6 (30%)  | 12<br>(26%) |
| Other                                         | NA | 9 (56%)  | 1<br>(10%) | 7 (35%)  | 17<br>(37%) |
| None                                          | NA | 3 (19%)  | 2<br>(20%) | 4 (20%)  | 9 (20%)     |
